# Supplementary material
Source: PubMed Central journal article supplement (PMC4356258)
Supplement: Supp_Figure1.pdf [file Supp_Figure1.pdf]

## Supplementary Data

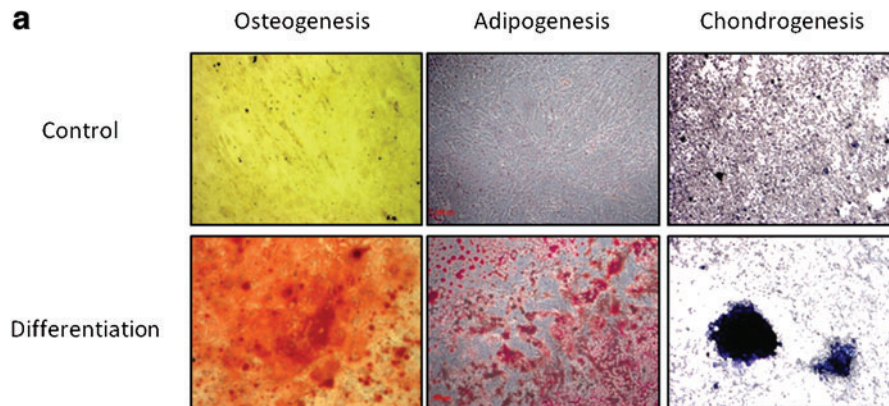

**b**

| Marker             | CD44  | CD105 | Sca1  | CD11b | CD34   | CD45  |
|--------------------|-------|-------|-------|-------|--------|-------|
| Untreated          | 99.5% | 94.7% | 98.6% | 1.83% | 0.860% | 1.28% |
| NF- $\kappa$ B ODN | 99.9% | 93.0% | 98.4% | 2.27% | 0.871% | 1.10% |
| S-ODN              | 99.9% | 94.6% | 98.3% | 2.34% | 0.775% | 1.34% |

**SUPPLEMENTARY FIG. S1.** Characterization of mouse MSCs in response to decoy ODN. **(a)** Osteogenic (day 21), adipogenic (day 14), and chondrogenic (day 21) differentiation abilities of mouse MSCs were evaluated at passage 4, as described in the Materials and Methods section. **(b)** Mouse MSCs were exposed to 0.5  $\mu$ M decoy ODN or scrambled ODN for 3 days. Cell surface marker expressions were analyzed by flow cytometry. MSCs, mesenchymal stem cells; ODN, oligodeoxynucleotide; S-ODN, scrambled ODN.
