# Supplementary material
Source: PubMed Central journal article supplement (PMC4356258)
Supplement: Supp_Figure2.pdf [file Supp_Figure2.pdf]

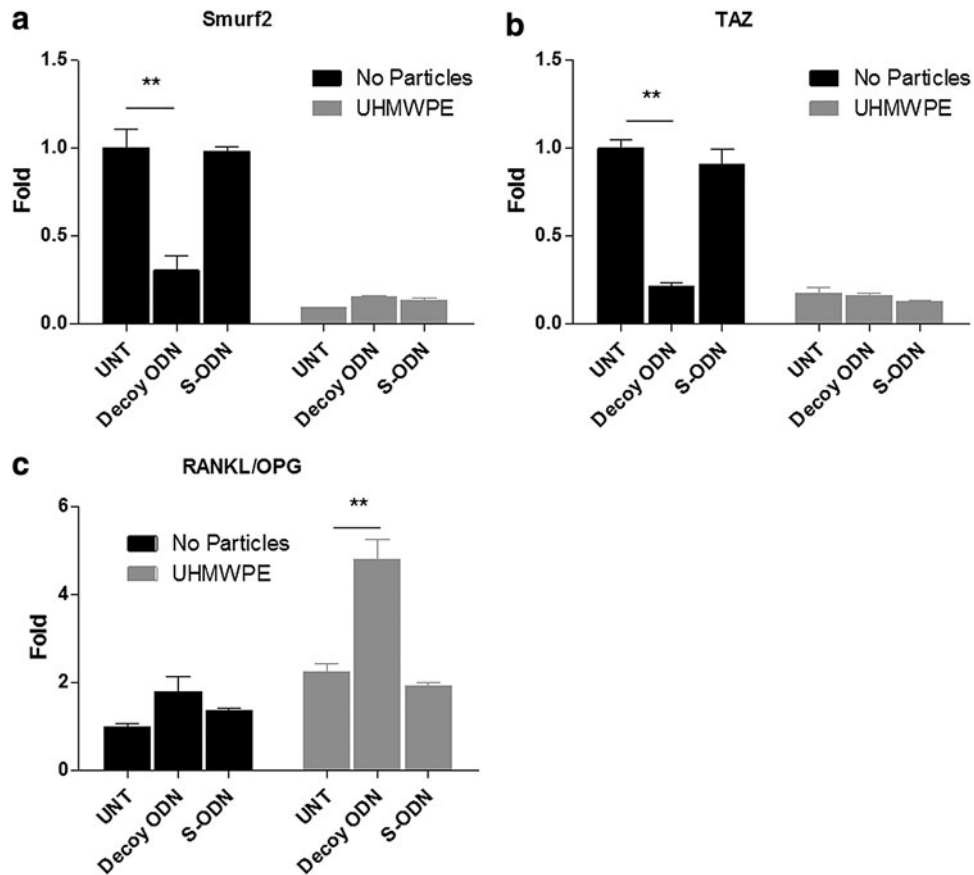

**SUPPLEMENTARY FIG. S2.** Osteogenic regulatory genes controlled by NF- $\kappa$ B signaling in MSCs. Mouse MSCs were cultured in the osteogenic differentiation medium exposed to 0.5  $\mu$ M decoy ODN or scrambled ODN, with or without ultrahigh-molecular-weight polyethylene particles. Cellular RNA was collected at day 14 and the expression of TAZ, Smurf2, and the ratio of RANKL/OPG were determined by quantitative polymerase chain reaction.  $**p < 0.01$ . OPG, osteoprotegerin; S-ODN, scrambled ODN; UNT, untreated control.
